# Supplementary material
Source: PubMed Central journal article supplement (PMC6756457)

## 4 weeks

### CD-1 Males

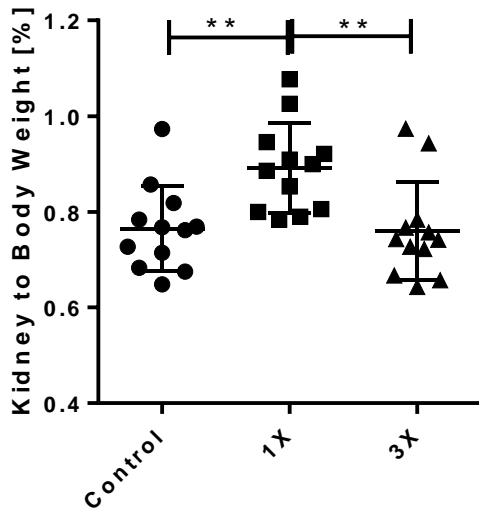

### CD-1 Females

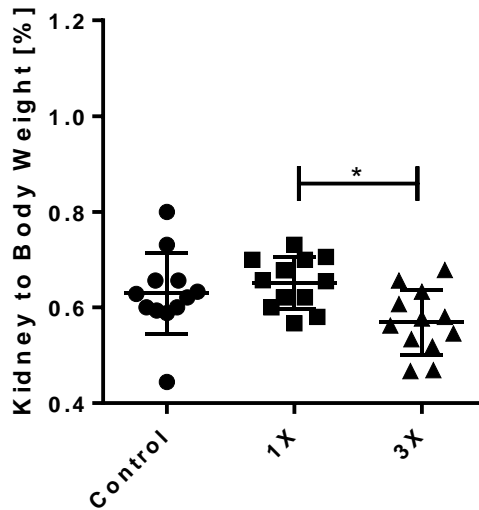

## 13 weeks

### CD-1 Males

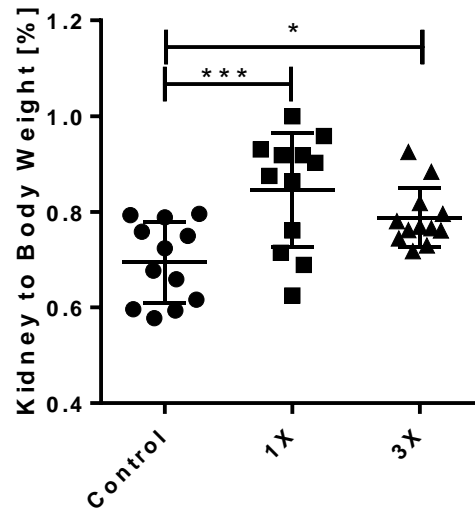

### CD-1 Females

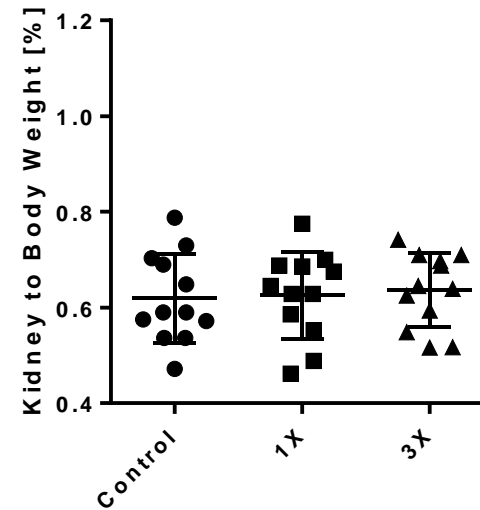

### B6C3F<sub>1</sub> Males

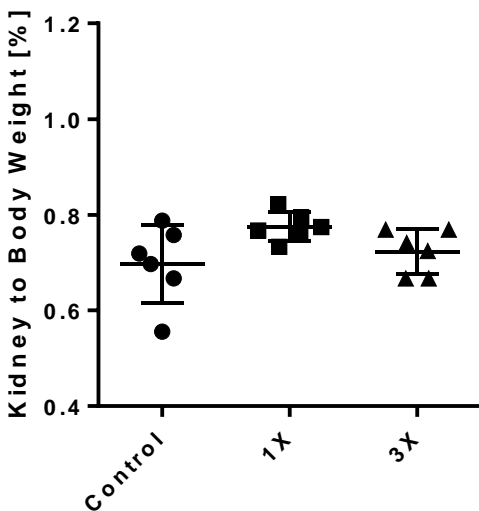

### B6C3F<sub>1</sub> Females

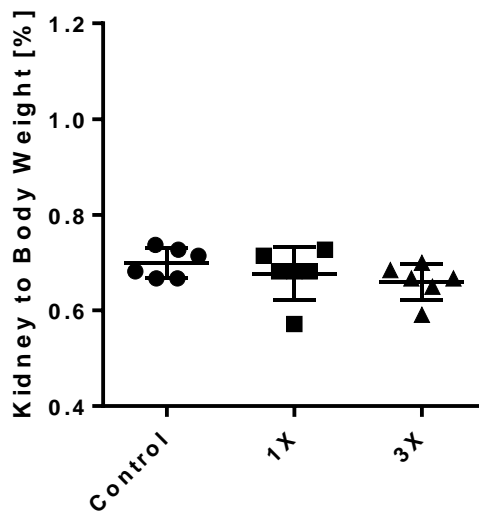

### B6C3F<sub>1</sub> Males

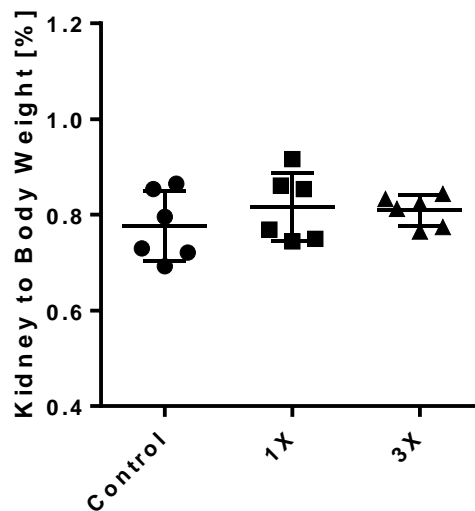

### B6C3F<sub>1</sub> Females

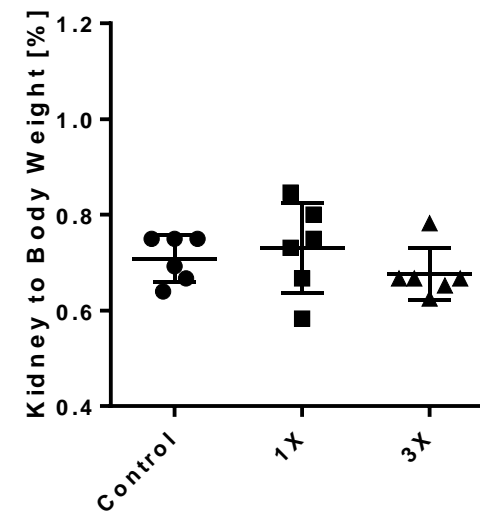

Supplement: NIHMS1047839-supplement-Suppl_Figure_4.pdf [file NIHMS1047839-supplement-Suppl_Figure_4.pdf]
