# Supplementary material
Source: PubMed Central journal article supplement (PMC6756457)

### CD-1 Male

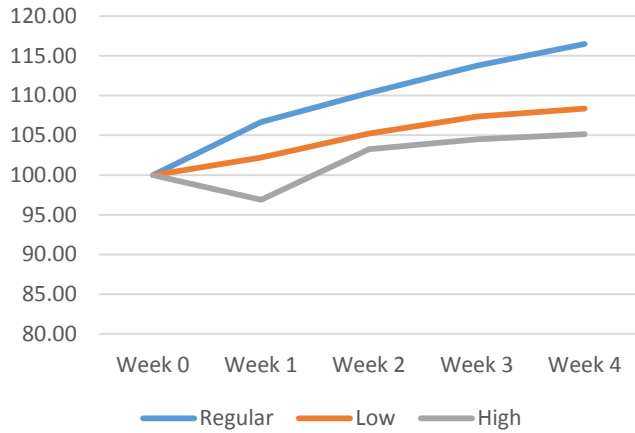

### CD-1 Female

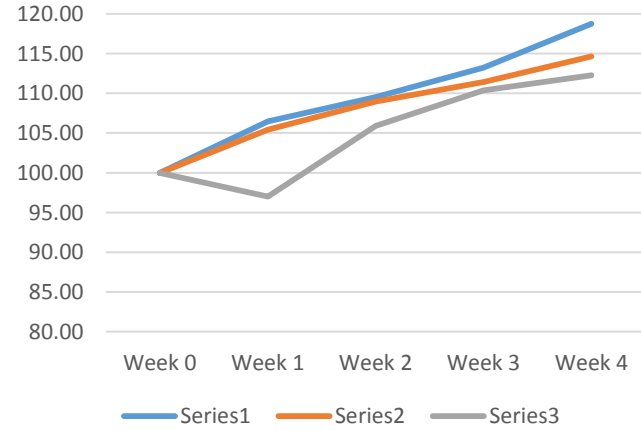

### B6C3F1 Male

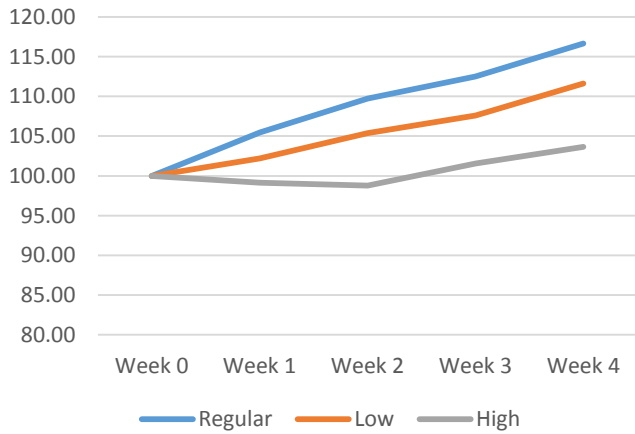

### B3C3F1 Female

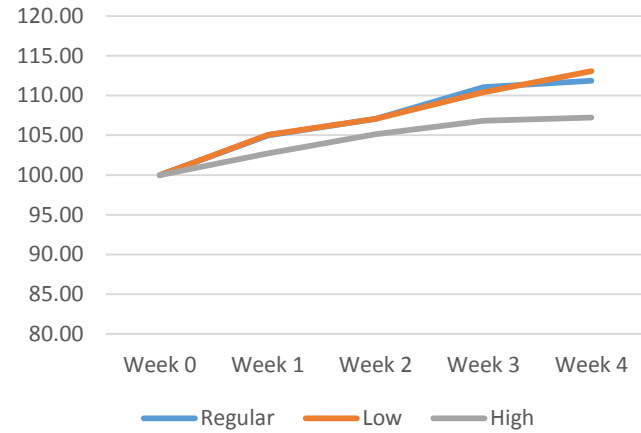

Supplement: NIHMS1047839-supplement-Suppl_Figure_1.pdf [file NIHMS1047839-supplement-Suppl_Figure_1.pdf]

miR-122

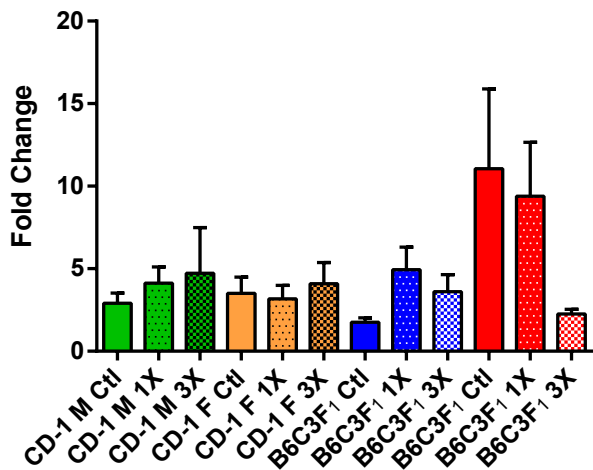

miR-29a

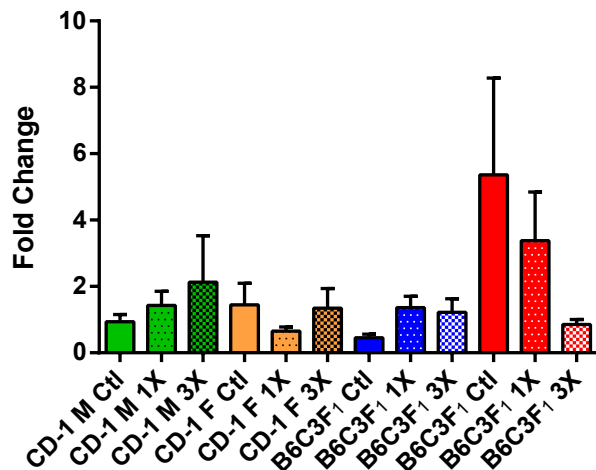

miR-101a

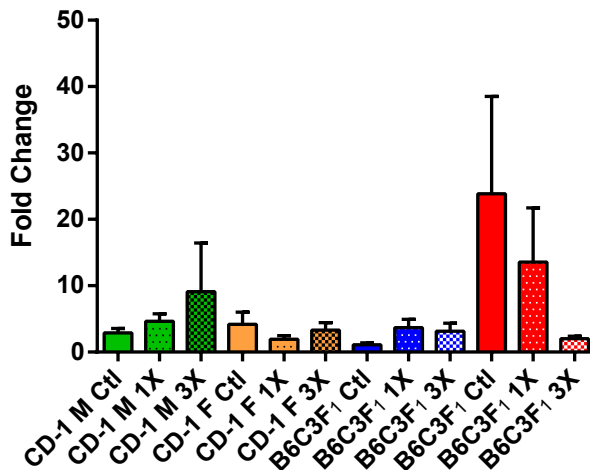

Supplement: NIHMS1047839-supplement-Suppl_Figure_2.pdf [file NIHMS1047839-supplement-Suppl_Figure_2.pdf]

miR-122

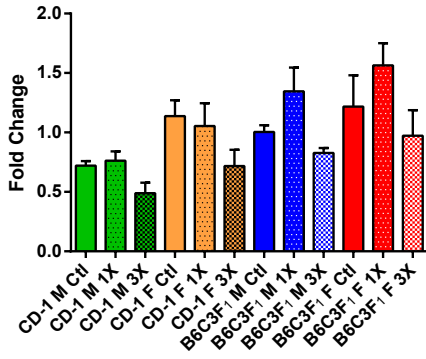

miR-21

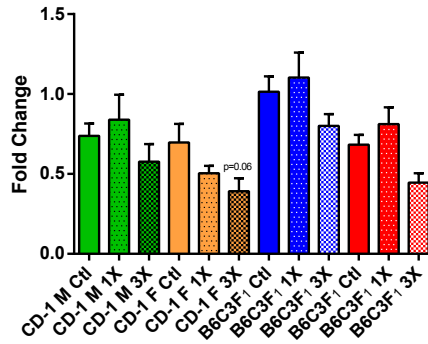

miR-192

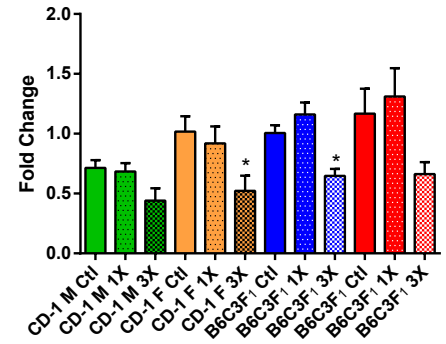

miR-101a

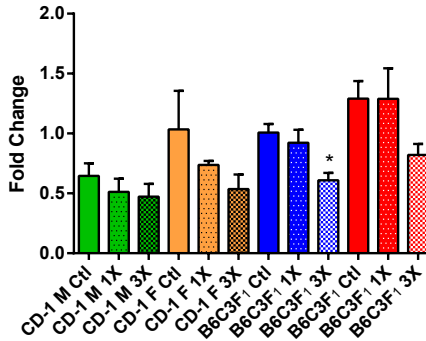

miR-193a

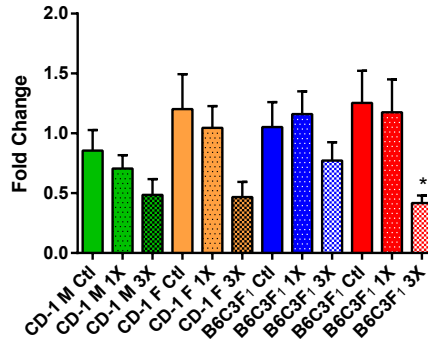

miR-29a

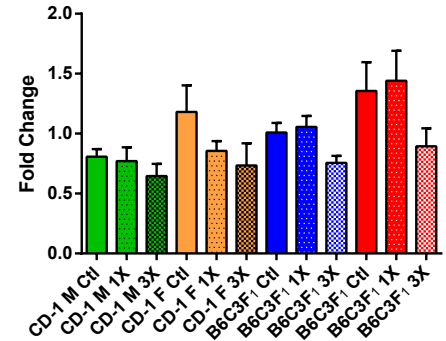

miR-483

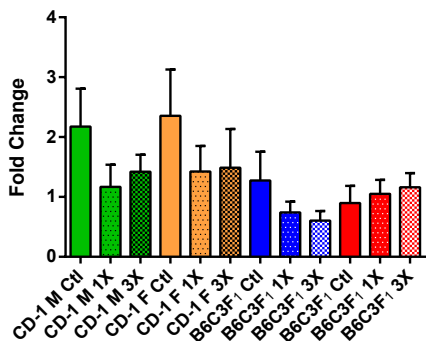

miR-125b

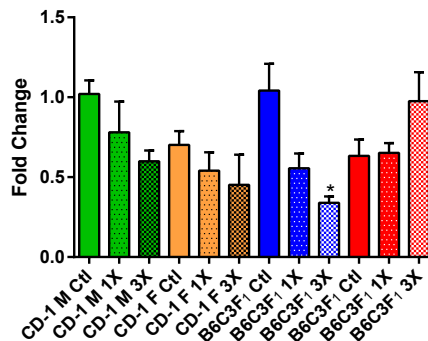

miR-146a

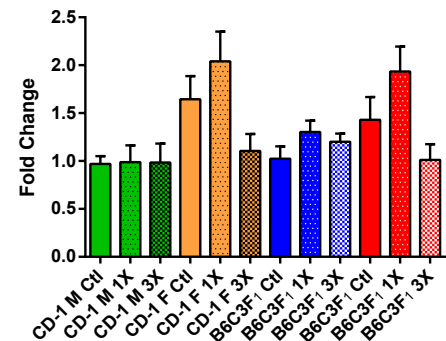

Supplement: NIHMS1047839-supplement-Suppl_Figure_3.pdf [file NIHMS1047839-supplement-Suppl_Figure_3.pdf]
